1 **Prey choice of the common vampire bat on introduced species in an Atlantic forest**  
2 **land-bridge island**

3  
4 Fernando Gonçalves<sup>1</sup>, Marcelo Magioli<sup>3,4,5</sup>, Ricardo S. Bovendorp<sup>1,6</sup>, Katia Maria  
5 Paschoaletto Micchi de Barros Ferraz<sup>3</sup>, Letícia Bulascoschi Cagnoni<sup>1</sup>, Marcelo  
6 Zacharias Moreira<sup>7</sup>, Mauro Galetti<sup>1,8</sup>

7

8 <sup>1</sup> Instituto de Biociências, Departamento de Biodiversidade, Universidade Estadual  
9 Paulista, 13506-900 Rio Claro, São Paulo, Brazil;

10

11

12 <sup>3</sup> Laboratório de Ecologia, Manejo e Conservação de Fauna Silvestre (LEMaC), Escola  
13 Superior de Agricultura ‘Luiz de Queiroz’, Universidade de São Paulo, Av. Pádua Dias,  
14 11, Agronomia, 13418-900, Piracicaba, São Paulo, Brazil;

15

16 <sup>4</sup> Centro Nacional de Pesquisa e Conservação de Mamíferos Carnívoros (CENAP),  
17 Instituto Chico Mendes de Conservação da Biodiversidade (ICMBio), Estrada  
18 Municipal Hisaichi Takebayashi, 8600, Bairro da Usina, 12952-011, Atibaia, São Paulo,  
19 Brazil;

20

21 <sup>5</sup> Instituto Pró-Carnívoros, Av. Horácio Neto, 1030, Parque Edmundo Zanoni, 12945-  
22 010, Atibaia, São Paulo, Brazil;

23

24 <sup>6</sup> Laboratório de Ecologia Aplicada à Conservação, Universidade Estadual de Santa  
25 Cruz, Rodovia Ilhéus-Itabuna, km16 /Salobrinho, 45662-900, Ilhéus, Bahia, Brazil;

26

27 <sup>7</sup> Laboratório de Ecologia Isotópica, Centro de Energia Nuclear na Agricultura (CENA),  
28 Universidade de São Paulo, Av. Centenário, 303, São Dimas, 13416-903, Piracicaba,  
29 São Paulo, Brazil;

30

31 <sup>8</sup> Department of Biology, University of Miami, Coral Gables, FL, USA

32

33 Correspondence

34 Fernando Gonçalves, Instituto de Biociências, Departamento de Biodiversidade,  
35 Universidade Estadual Paulista, 13506-900 Rio Claro, São Paulo, Brazil. Email:  
36 fhm.goncalves@unesp.br

37

38

39 Short title: Prey choice of common vampire bat on introduced species

40

41

42

43

44

45

46

47 **Abstract**

48

49 The proliferation of native, alien, invasive and domestic species provide novel and  
50 abundant food resources for the common vampire bat (*Desmodus rotundus*) that could  
51 alter its prey preference. Based on the analysis of carbon and nitrogen stable isotopes,  
52 we report the prey choice of *D. rotundus* on introduced mammals in an tropical land-  
53 bridge island where the domestic animals were removed and 100 individuals of 15  
54 mammal species were intentionally introduced. Our analysis shows that, *D. rotundus* on  
55 Anchieta Island were more likely to prey upon species from open habitats (mean value  
56 of -14.8‰), i.e., animals with high  $\delta^{13}\text{C}$  values characterized by the consumption of C4  
57 resources. As expected for a top predator species,  $\delta^{15}\text{N}$  values for *D. rotundus* were  
58 higher (mean value of 8.2‰) and overlapped the niche of the capybaras (*Hydrochoerus*  
59 *hydrochaeris*) from the Anchieta Island, while it was distant from coatis, and also from  
60 those potential prey from the preserved area in the mainland, including the capybaras,  
61 indicating that among all potential mammalian prey species, they fed exclusively on  
62 capybaras, the highest mammalian biomass on island. Based on previous information on  
63 human occupation, the domestic animals present on Anchieta island might be the main  
64 prey of *D. rotundus* and responsible for maintaining a viable population. As the  
65 capybaras were introduced only 36 years ago, this suggests a rapid prey shift due to  
66 anthropogenic disturbances, which has allowed common vampire bats to successfully  
67 exploit them. Literature records also show that common vampire bats were not captured  
68 in preserved areas of the mainland which are near Anchieta Island indicating that the  
69 percentage of capture of *D. rotundus* is usually low in natural forested habitats where  
70 potential prey are scattered. As three individuals of introduced capybaras were  
71 confirmed died from bat rabies viruses (RABV) in 2020, we suggest periodic  
72 monitoring of bat rabies viruses in common vampire bat populations on Anchieta Island  
73 and areas nearby, in order to quantify the magnitude of the outbreak area and develop  
74 strategies for controlling, especially considering that the island and areas nearby is  
75 frequently visited by tourists. We highlighted that this prey choice is context-dependent,  
76 and possibly influenced by the removal of domestic animals, the explosive population  
77 growth of introduced capybaras combined with their predictable foraging behavior.

78

79

80

81

82

83

84

85

86

87

88

89

90

91

92

93

94

95

96

97 **Introduction**

98 The common vampire bat *Desmodus rotundus* (Geoffroy, 1810), an obligate blood-  
99 feeding species and the primary reservoir of rabies, has experienced changing  
100 availability of both wild and domestic prey (Greenhall *et al.*, 1983; Galetti *et al.*, 2016;  
101 Gnocchi and Srbek-Araujo, 2017; Zortéa *et al.*, 2018) throughout its range from Mexico  
102 to northern Argentina. Usually, common vampire bats have low densities in old-growth  
103 forest (Bernard, 2001; Bobrowiec *et al.*, 2014; Gonçalves *et al.*, 2017) where potential  
104 prey are sparse, but their population increases in fragments surrounded by pastures  
105 (Delpietro *et al.*, 1992; Bobrowiec, 2012) due the increased availability of livestock  
106 species (Greenhall, 1988; Delpietro *et al.*, 1992; Bobrowiec, 2015). The higher  
107 livestock densities in the Neotropical region combined with introduction of native, alien  
108 and invasive species, has created a novel, abundant and reliable source of blood for  
109 common vampire bats, causing population growth and geographic range expansions  
110 (Delpietro *et al.*, 1992; Lee *et al.*, 2012; Bobrowiec *et al.*, 2015; Galetti *et al.*, 2016).

111 Detailed analyses of prey choice of common vampire bat in this anthropogenic  
112 scenario are fundamental to answer questions on trophic interactions, how predators and  
113 prey interact, and how prey availability affects predator density and distribution  
114 (Sheppard and Harwood, 2005). In the past two decades, studies have used stable  
115 isotope analysis and molecular typing of DNA in vampire bat faeces to demonstrate  
116 reliance on livestock when they are locally abundant (Voigt and Kelm, 2006;  
117 Bobrowiec *et al.*, 2015) and studies with camera traps based on video footage have  
118 revealed behavioral aspects of feeding on wild species (Castellanos and Banegas, 2015;  
119 Galetti *et al.*, 2016; Gnocchi and Srbek-Araujo, 2017; Zortéa *et al.*, 2018). However,  
120 prey choice in regions with introduced species rather than livestock have not been  
121 studied yet, but are of critical importance due to risks to public health and consequences

122 for the transmission of infectious diseases by altering demographic processes, animal  
123 interactions and host immunity (Schneider *et al.*, 2009; Stoner-Duncan *et al.*, 2014;  
124 Streicker and Allgeier, 2016).

125 Here, we report, based on analysis of stable carbon and nitrogen isotopes, the  
126 prey choice of common vampire bats (*Desmodus rotundus*) on introduced mammals on  
127 a tropical island where 100 individuals of 15 mammal species were intentionally  
128 introduced 36 years ago. Our analysis shows that, between two suitable species  
129 classified as potential prey, they fed exclusively on capybaras (*Hydrochoerus*  
130 *hydrochaeris*), the highest mammalian biomass on the island. We highlight that this  
131 prey choice of common vampire bats are context-dependent, and possibly influenced by  
132 the removal of domestic animals, the explosive population growth of introduced  
133 capybaras combined with their predictable foraging behavior.

## 134 **Materials and Methods**

### 135 *Study area*

136 The study was carried out on Anchieta Island (23°27'S; 45°02'W), an 828-ha land-  
137 bridge island in Ubatuba, north coast of São Paulo State, Brazil (Fig. 1). The island is  
138 500-meter away from the mainland and has a long history of human occupation and was  
139 called as Ilha dos porcos (Pigs Island) in allusion to the large number of pigs that  
140 existed on island (Guillaumon *et al.*, 1989). In the beginning of the last century, the  
141 island had a prison and, especially during the years when the prison was active (1904-  
142 1955), cattle, pigs, dogs, cats, and the domestic fowl were brought to the island (Galetti  
143 *et al.* 2009) in order to sustain its human community that reached over 1,000 residents  
144 belonging to 420 families (Guillaumon *et al.*, 1989). The prison and all infrastructures  
145 were expropriated and the island was transformed into a state park in 1977, and all the  
146 domestic animals were removed (Guillaumon *et al.*, 1989).

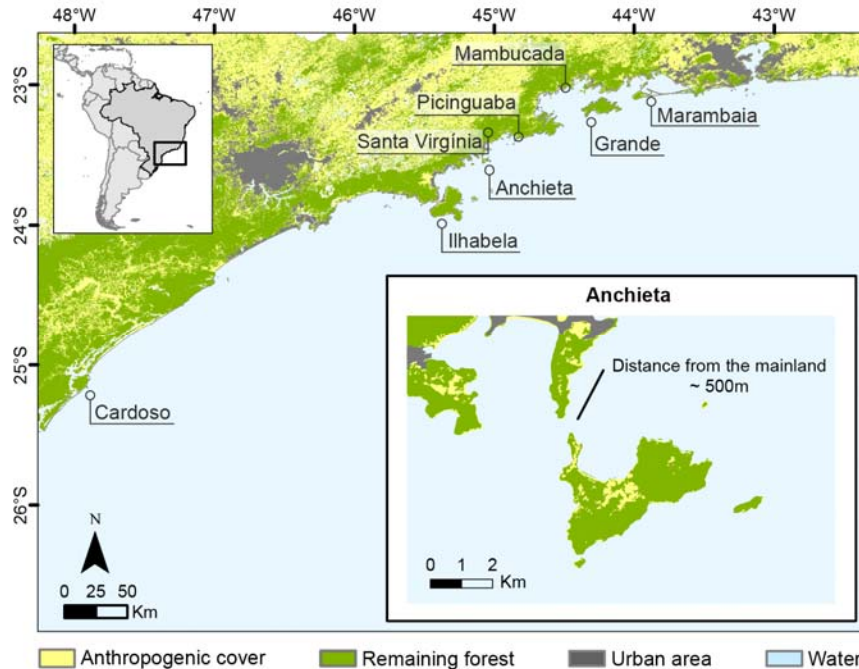

148

149 Fig. 1: Location of Anchieta Island, state of São Paulo, southeastern Brazil and its  
150 proximity with another islands and mainland sites.

151

152 In March 1983, the São Paulo Zoo Foundation introduced 100 individuals of 14  
153 mammal species on island (Guillaumon *et al.*, 1989). Of the 14 species introduced onto  
154 1983, seven species have not been recorded since and have probably been extirpated  
155 (Bovendorp and Galetti, 2007; Supporting information S1). Little is known about the  
156 mammalian fauna on the island prior to human occupation. However, it is probable that  
157 it was similar to that on the continent given its proximity (500 m), with the exception of  
158 large predators (e.g., jaguars and pumas) and ungulates. Thirty-six years after  
159 introduction, the island now harbors the highest density of terrestrial mammals (486  
160 ind./km<sup>2</sup>) in the entire Atlantic Forest (Bovendorp and Galetti, 2007). The vegetation on  
161 the island is composed of coastal Atlantic rainforest, with coastal plains where notable  
162 features include a stretch of *restinga* (a distinct type of coastal tropical and subtropical  
163 moist broadleaf forest), and large areas of disturbed vegetation dominated by ferns  
(*Gleichenia*).

164 In October 2017 and November 2018, we did two field expeditions in order to  
165 capture and sample the predator-prey systems. We selected three accessible forest sites,  
166 and three accessible open sites. Sample sites were selected without prior knowledge of  
167 the presence of common vampire bats or their potential prey. During each field  
168 expedition, each habitat was sampled for three consecutive days in order to equally  
169 divide efforts.

170

#### 171 *Capture and sampling of common vampire bats*

172 We mist-netted bats during three consecutive nights in two field expeditions.  
173 Netting was undertaken during the absence of moonlight, using  $2.6 \times 12$  m ground-level  
174 mist nets opened for six hours after dusk. The number of nets per night ranged from  
175 three to six, but did not vary among sampling habitats (open area and forest). The  
176 capture effort (net area multiplied by the number of hours nets were open) in each  
177 habitat was  $310 \text{ m}^2\text{h}$ . All captured bats were kept individually in cloth bags for 45–60  
178 min, during which time we collected hair from the dorsal posterior region for stable  
179 isotope analysis. We then released the specimens at the site of capture.

180

#### 181 *Capture and sampling of potential prey*

182 According to literature records, common vampire bats just feed on medium-size  
183 and/or large mammals ( $> 1$  kg), thus coatis (*Nasua nasua*) and capybaras (*H.*  
184 *hydrochaeris*) are the only suitable potential prey on the Island. In order to capture and  
185 collect hair from coatis, we used 30 live traps in each sampling site (forest and open),  
186 during three consecutive nights simultaneously to the mist nets, which resulted in an  
187 effort of 360 trap-nights. For capybaras, we collected hair samples stuck in barbed-wire  
188 fences in all trails on Anchieta Island. To complement our sampling effort, hair samples

189 from coati and capybaras were collected opportunistically with tweezers. All captures,  
190 handling, and tagging techniques followed the guidelines of the Mammal Society (Sikes  
191 *et al.*, 2016).

192 To understand if the common vampire bat uses the mainland nearby Anchieta  
193 Island to feed on wild animals, we used isotopic values obtained by Magioli *et al.*  
194 (2019) on five large-bodied mammals [white-lipped peccary (*Tayassu pecari*), collared  
195 peccary (*Pecari tajacu*), deer (*Mazama* sp.), lowland tapir (*Tapirus terrestris*) and  
196 capybara] from a protected area of the mainland (Núcleo Santa Virgínia, an  
197 administrative division of the Serra do Mar State Park). This area is inserted in the  
198 largest continuous remnant of the Atlantic Forest, and distance ~19 km (Fig. 1) in a  
199 straight line from Anchieta Island.

200

#### 201 *Common vampire bats feeding on potential prey*

202 We observed common vampire bats feeding by *ad libitum* sampling (Martin and  
203 Bateson, 2007) during 17 nights (47 hours of observation), in October 2017 and  
204 November 2018 in the same 6 selected sampling sites. Observations occurred between  
205 specific shifts of two to five hours per night, between 6pm and 5am. Observers,  
206 equipped with red flashlights, were situated on high ground in order to see the entire  
207 area. When capybara were detected, the observers approached them slowly, and  
208 observed if common vampire bats were feeding. If feeding was detected, we recorded it  
209 (WebVideos S1 and S2).

210

#### 211 *Data analysis*

212 We also compiled bat capture data from literature, including capture effort, from  
213 only two previous studies on the island (Aires, 1998; Colas-Rosas, 2009), in order to

214 complement our species list and to estimate the percentage of capture. The percentage  
215 of capture of common vampire bats on Anchieta Island was calculated by dividing the  
216 number of total common vampire bat mist-netted by the effort ( $m^2h$ ) multiplied by 100.  
217 We used data from Bovendorp and Galetti (2007) to estimate the potential prey density  
218 on the island, and to estimate prey biomass, we used body mass data from Gonçalves et  
219 al. (2018).

220

### 221 *Stable isotopes analysis*

222 To analyze the stable carbon and nitrogen isotopes, we cleaned the hair samples  
223 with water and 70% alcohol to remove any residue and dried them with absorbent  
224 paper. We then cut up the samples and stored them in thin capsules. Later, we used a  
225 CHN-1110 Elemental Analyzer (Carlo Erba, Milan, Italy) to combust the material, and  
226 separated the resultant gases in a chromatographic column. Lastly, we inserted the gases  
227 in a coupled continuous flow isotope ratio mass spectrometer (Delta Plus, Thermo  
228 Scientific, Bremen, Germany) to obtain the isotopic composition of the samples. The  
229 isotopic values of carbon and nitrogen were expressed in delta notation ( $\delta^{13}C$ ,  $\delta^{15}N$ ) in  
230 parts per mil (‰) relative to the V-PDB (Vienna-Pee Dee Belemnite) and atmospheric  
231  $N_2$  standards, respectively. Delta values were calculated based on the standards using  
232 the following equation  $\delta X = [(R_{\text{sample}}/R_{\text{standard}}) - 1]$  multiplied by 1000, where X  
233 represents the stable carbon or nitrogen isotopes ( $^{13}C$  or  $^{15}N$ ), and R the isotopes ratio  
234 ( $^{13}C/^{12}C$  or  $^{15}N/^{14}N$ ).

235 We performed the replication of the same individual material for only 10% of  
236 the samples, but the precision of the analytic method for 22 replicas of an internal  
237 standard for all batches, was estimated as 0.09‰ for carbon and nitrogen. The samples  
238 were anchored to international scales by the use of international reference materials:



239 NBS-19 and NBS-22 for carbon, and IAEA-N1 and IAEA-N2 for nitrogen.

240

241 *Resource use*

242 To obtain information on resource use of common vampire bats, we adapted the  
243 analytical approach used by Magioli et al. (2014, 2019). The analysis consists of using a  
244 simple mixed model that interpolates the stable carbon isotopic values of samples,  
245 accounting for specific fractionation factors, with the mean values of the different  
246 vegetation types ( $C_3$  and  $C_4$  plant photosynthetic cycles), while also considering the  
247 minimum and maximum values obtained for all animal samples analyzed. To estimate  
248 fractionation factors ( $\Delta^{13}C$  and  $\Delta^{15}N$ ), we used the ‘SIDER’ package (Healy et al.  
249 2018), available in R 3.5.3 (R Development Core Team 2019), that estimates species-  
250 specific fractionation factors from phylogenetic regression models, accounting for a  
251 database of fractionation values available for several species. We generated the  $\Delta^{13}C$   
252 value for the common vampire bats ( $2.1 \pm 1.9\%$ ) using the script available in (Healy *et*  
253 *al.*, 2018).

254 To determine the origin of food items consumed by the mammals, i.e.,  $C_3$  or  $C_4$   
255 plants, we calculated the carbon content in each sample ( $\delta^{13}C$  values corrected by  $\Delta^{13}C$   
256 values) using the following equation:

257

$$C_3 \text{ carbon incorporated (\%)} = \frac{\delta^{13}C_{\text{corrected sample}} - \delta^{13}C_{\text{mean } C_4 \text{ vegetation}}}{\delta^{13}C_{\text{mean } C_3 \text{ vegetation}} - \delta^{13}C_{\text{mean } C_4 \text{ vegetation}}} * 100$$

258

259 We used as base for our model, the mean  $\delta^{13}C$  value of  $-32\%$  to indicate  $C_3$   
260 plants, and  $-12\%$  V-PDB to  $C_4$  plants. These values were obtained from the extreme  
261  $\delta^{13}C_{\text{corrected}}$  values of all animal samples analyzed (predator and prey). After calculating  
262 the proportion of  $C_3/C_4$  carbon, we classified samples in three groups: (1)  $C_3$  group –

263 species that preferentially consumed C<sub>3</sub> items (> 70% of C<sub>3</sub> carbon;  $\delta^{13}\text{C} = -32$  to -  
264 26‰); (2) Mixed group – species that used both C<sub>3</sub> and C<sub>4</sub> food items (from 30 to 70%  
265 of C<sub>3</sub> carbon;  $\delta^{13}\text{C} = -25.9$  to  $-18.1$ ‰); C<sub>4</sub> group – species that mainly consumed C<sub>4</sub>  
266 items (< 30% of C<sub>3</sub> carbon;  $\delta^{13}\text{C} = -18$  to  $-12$ ‰). We also corrected the  $\delta^{15}\text{N}$  values  
267 using the fractionation factor ( $\Delta^{15}\text{N} = 3.4 \pm 1.5$ ‰) generated by the ‘SIDER’ package.

268

### 269 *Isotopic niches*

270 To assess the overlap of resource use by the common vampire bat and its  
271 potential prey, we analyzed the size of the isotopic niches using the ‘SIBER’ package  
272 (Jackson *et al.*, 2011), available in R 3.5.3. This package calculates the standard ellipses  
273 area (SEA) using  $\delta^{13}\text{C}_{\text{corrected}}$  and  $\delta^{15}\text{N}_{\text{corrected}}$  values, which contain 95% of the data,  
274 independent of sample size, allowing comparison of the isotopic niche width between  
275 species. To control sample size, we used the SEA corrected (SEAc).

276

## 277 **Results**

### 278 *Capture of common vampire bats and potential prey*

279 We recorded 187 individuals (16 of common vampire bats) belonging 13 bat species on  
280 Anchieta Island (Supporting information S2) and collected fur of 17 individuals of  
281 capybaras and 10 coatis (Supporting information S3 and S4). The percentage of capture  
282 for common vampire bats was 0.12% (16 individuals/12607 m<sup>2</sup>h \* 100) (Supporting  
283 information S2), while the mean density of both potential prey was estimated as 60.9  
284 individuals/km<sup>2</sup> (coati = 25.06 and capybara = 35.30) (Table 1). Capybaras showed the  
285 highest mean biomass (1,112 kg/km<sup>2</sup>) on the island (Table 1). Due to the predictable  
286 foraging behavior of capybaras in open areas, only the bat-capybara system was  
287 detected by observers. The common vampire bat fed on capybaras in 17 observations

288 during 47 hours of sampling effort (Supporting information S5, WebVideos S1 and S2).

289

290 *Prey choice of the common vampire bat*

291 Common vampire bats on Anchieta Island were more likely to prey upon species  
292 from open habitats (mean value of  $-14.8\text{‰}$ ), i.e., animals with high  $\delta^{13}\text{C}$  values  
293 characterized by the consumption of  $\text{C}_4$  resources. The  $\delta^{15}\text{N}$  values for common  
294 vampire bats were higher than expected and most likely similar with apex predator  
295 species (mean value of  $8.2\text{‰}$ ) (Fig. 2, Supporting information S3). One of the potential  
296 prey – the coati – largely depended on resources from the forest remnants ( $\text{C}_3$  resources)  
297 (Fig. 2). Capybaras presented a large isotopic niche, using resources from both open  
298 areas and forest remnants, but feeding mainly on  $\text{C}_4$  plants (Fig. 2). The isotopic niche  
299 of common vampire bats overlapped the niche of the capybaras, while it was distant  
300 from coatis (Fig. 2), and distinct from mean values of potential prey in the mainland,  
301 including the capybaras there (Fig. 3).

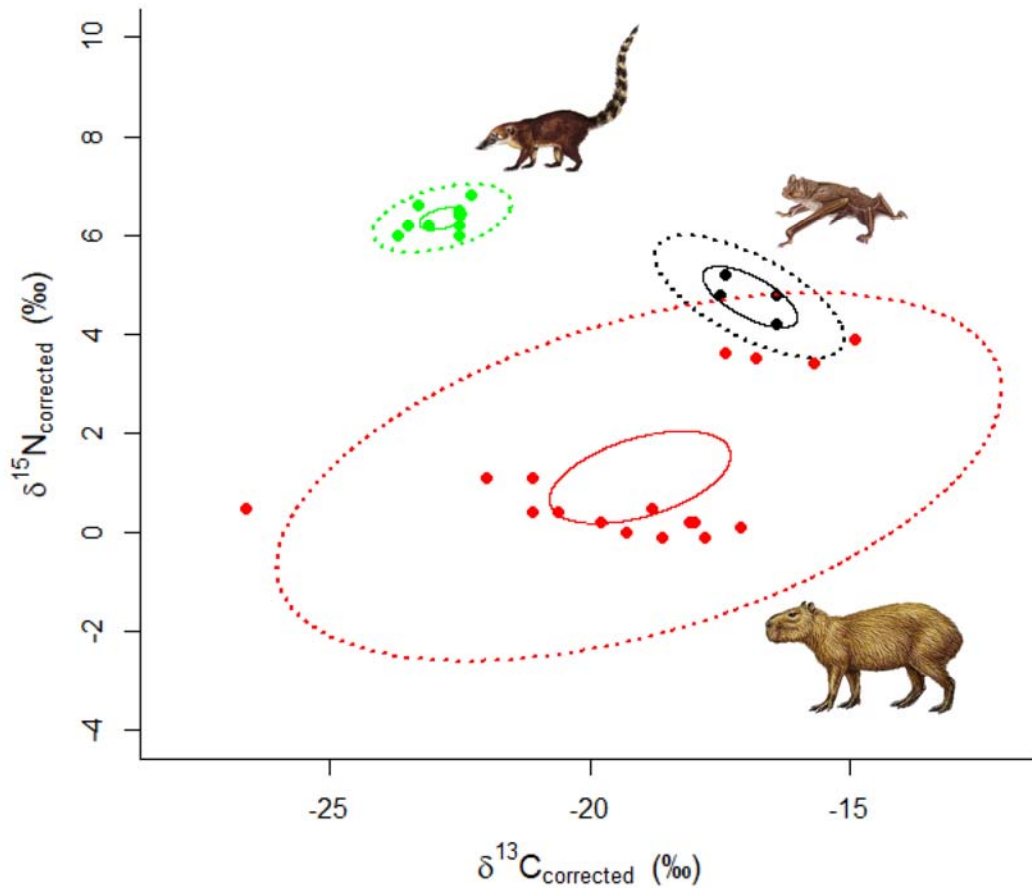

302

303 Fig. 2: Isotopic niches (standard ellipses area corrected - SEAC) and individual values  
304 ( $\delta^{13}\text{C}$ ,  $\delta^{15}\text{N}$ ) of common vampire bats (*Desmodus rotundus*) (black) and its potential  
305 prey on Anchieta Island, state of São Paulo, southeastern Brazil. Isotopic values for *D.*  
306 *rotundus* were corrected using species-specific fractionation factors ( $\Delta^{13}\text{C} = 2.1\text{‰}$ ;  
307  $\Delta^{15}\text{N} = 3.4\text{‰}$ ). Dashed lines = estimated standard ellipses using 95% of the data; solid  
308 lines = confidence intervals (95%) around the bivariate means; capybara (*Hydrochoerus*  
309 *hydrochaeris*) = red; Coati (*Nasua nasua*) = green.  
310

### 311 Discussion

312 The isotopic niche of common vampire bats overlapped the capybaras' niche from the  
313 Anchieta Island (Fig. 2), and was distinct from the mean values of potential prey in the  
314 preserved area of the mainland (Fig. 3), indicating that capybaras from the Anchieta  
315 island are their main food source. Even with concentrated sampling effort, our results  
316 support previous studies that showed a choice of common vampire bats to feed on  
317 locally abundant and reliable prey (Voigt and Kelm, 2006; Bobrowiec *et al.*, 2015;

318 Streicker and Allgeier, 2016, Zórtea *et al.*, 2018). Previous long-term isotopic studies,  
319 which analyzed tissues with different isotopic turnover rates (e.g. blood, skin, hair from  
320 the different individuals and assemblages) showed that the common vampire bat dietary  
321 preferences have low variability over time and did not change over seasons (Voigt and  
322 Kelm, 2006; Voigt *et al.*, 2008; Voigt, 2009; Streicker and Allgeier, 2016). This  
323 information was also supported by our direct observations, which showed that the  
324 common vampire bats can use memory and/or sensory cues to repeatedly feed on the  
325 same group of capybaras (Groger and Wiegrebe, 2006; Bahlman and Kelt, 2007,  
326 WebVideos S1 and S2).

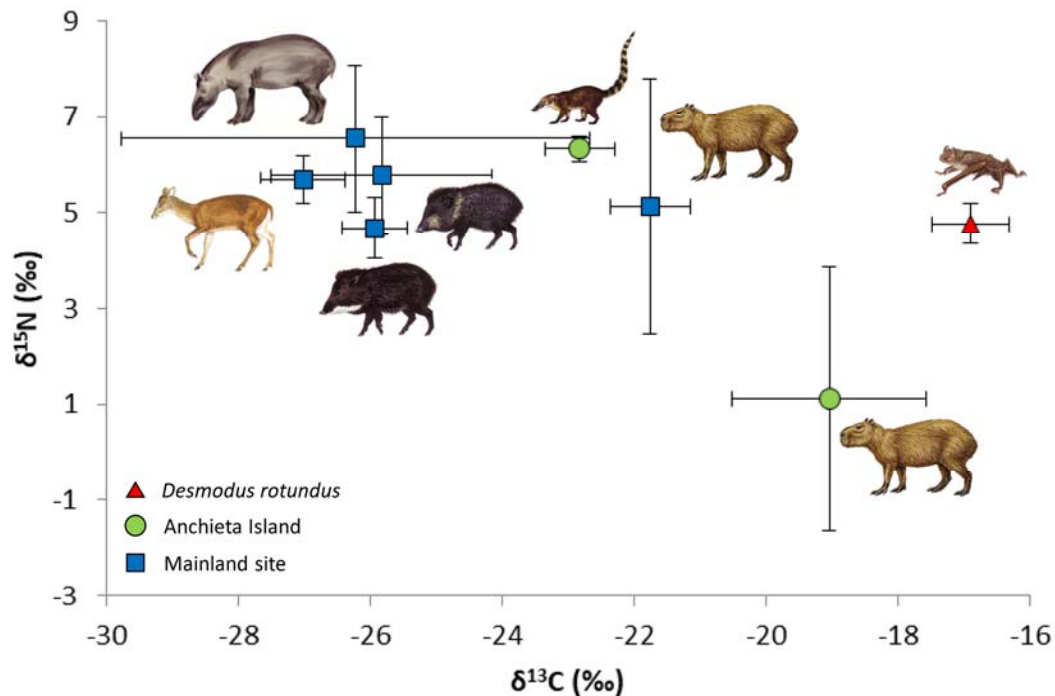

327

328 Fig. 3: Mean and standard deviation of  $\delta^{13}\text{C}$  and  $\delta^{15}\text{N}$  values of common vampire bats  
329 (*Desmodus rotundus*; red triangle) and its potential prey on Anchieta Island (green  
330 circles) and Núcleo Santa Virgínia of the Serra do Mar State Park (mainland site; blue  
331 squares), state of São Paulo, southeastern Brazil. Isotopic values for *D. rotundus* were  
332 corrected using species-specific fractionation factors ( $\Delta^{13}\text{C} = 2.1$ ‰;  $\Delta^{15}\text{N} = 3.4$ ‰).  
333 Anchieta Island potential prey: Capybara (*Hydrochoerus hydrochaeris*) and coati (*Nasua  
334 nasua*). Mainland site potential prey: White-lipped peccary (*Tayassu pecari*), collared  
335 peccary (*Pecari tajacu*), deer (*Mazama* sp.), lowland tapir (*Tapirus terrestris*) and  
336 capybara.  
337

338 Common vampire bats were not captured in studies in preserved areas of the  
339 mainland (Picinguaba, Mambucada e Santa Virgínia), which are near Anchieta Island  
340 (Supporting information S6, Fig. 1). This evidence corroborates the hypothesis that the  
341 percentage of capture of common vampire bats is usually low in natural forested  
342 habitats where potential prey are scattered, and high in areas with high concentration of  
343 prey (Turner, 1975; Bobrowiec *et al.*, 2015). Also, the number of individuals mis-  
344 nested varied on island nearby that have different history of human occupation  
345 (Supporting information S6, Fig. 1) indicating that common vampire bats may respond  
346 according to different type and intensity of anthropogenic disturbance (Streicker and  
347 Allgeier, 2016, Gonçalves *et al.*, 2017).

348 The current native mammal fauna on the Anchieta Island was quite  
349 impoverished due to its isolated location, as well as past human impact (Bovendorp and  
350 Galetti, 2007, Souza *et al.*, 2019, Supporting information S1). There are no previous  
351 studies about the occurrence and/or diet of common vampire bats on the island in the  
352 beginning of the last century (Garbino *et al.*, 2016, Muylaert *et al.*, 2017). However,  
353 previous information on human occupation on island (Guillaumon *et al.*, 1989) and  
354 record of common vampire bats in the mainland and island nearby Anchieta (Garbino *et*  
355 *al.*, 2016), led us to believe that domestic animals present there (especially cattle, pigs  
356 and dogs) were the main prey and responsible for maintaining a viable population of the  
357 species on island. When the island became a state park in 1977, all the domestic animals  
358 were removed (Guillaumon *et al.*, 1989) and forced the population of common vampire  
359 bats to leave or to reach very low density. After the species introductions in 1983,  
360 capybaras underwent explosive population growth due to food availability and absence  
361 of predators, and became an abundant and reliable source of blood for common vampire  
362 bats on Anchieta Island. The new scenario allowed common vampire bats to return to

363 the island and/or increase the population densities. An alternative hypothesis is that  
364 common vampire bats never existed on the island and the new scenario created after  
365 species introductions allowed the species to colonize then.

366 The extent to which common vampire bats can shift to new food sources is  
367 poorly understood, but the degree to which they exhibit dietary shifts and how these  
368 feeding strategies respond to human activity, can be an indicator of community-level  
369 responses to environmental changes (Bolnick *et al.*, 2002; Layman *et al.*, 2007;  
370 Gonçalves *et al.*, 2017). The common vampire bat needs to feed every night (Freitas *et*  
371 *al.*, 2003), and prey that are dispersed or free to walk are more difficult to attack  
372 (Delpietro, 1989). Capybaras present a more predictable and constant food source on  
373 Anchieta Island, as they feed on grasses in open areas during the night, and are larger  
374 than coatis, reinforcing our conclusion that capybaras are the most attractive and  
375 reliable food source for common vampire bats in the study area.

376 The large biomass of capybaras on Anchieta Island and their predictable  
377 behavior, make them easy to find and more accessible than other potential prey for the  
378 common vampire bat. As the species was introduced to Anchieta Island only 36 years  
379 ago, this suggests a rapid prey shift due to anthropogenic disturbances, which has  
380 allowed common vampire bats to successfully exploit them. The shift from a livestock-  
381 based diet to introduced species poses interesting questions for common vampire bat  
382 health and behavior. Blood from translocate species might affect common vampire bats  
383 directly through differences in nutritional quality and exposure to new diseases, as  
384 detected in some bat individuals from Anchieta Island in which leptospirosis was  
385 serologically confirmed (Aires, 1998). Beyond that, three individuals of introduced  
386 capybaras were confirmed died from bat rabies viruses (RABV) in 2020 (PS Moreira,  
387 unpublished data) and we suggest, then, a periodic monitoring of bat rabies viruses

388 (RABV) in common vampire bat populations on Anchieta Island and areas nearby, in  
389 order to quantify the magnitude of the outbreak area and develop strategies for  
390 controlling viruses, especially considering that the island and areas nearby is frequently  
391 visited by tourists.

392 In summary, stable isotope analysis is a useful tool for studying prey choice  
393 because it integrates information across wide time spans when quantified from tissues  
394 with slow turnover such as hair (Peterson and Fry, 1987), which in vampire bats,  
395 represent prey choice over 4–6 months prior to sampling (Voigt and Kelm, 2006).

396 Our results indicate that, in the absence of livestock and domestic animals, vampire bats  
397 on Anchieta Island feed primarily on capybara, which is consistent with the bats having  
398 a preference for abundant species. The results are context-dependent and strongly  
399 influenced by: (1) the extirpation of domestic animals (2) the high abundance of this  
400 prey species, that is the highest mean biomass on the island; (3) the predictable foraging  
401 behavior of capybaras in open areas.

402

### 403 **Supplementary Material**

404 **Supporting Information S1.** Introduced species and current population size and  
405 density of mammals [adapted from (Bovendorp and Galetti, 2007)] on the Anchieta  
406 island and their respective biomass [body mass according to Gonçalves et al. (2018)].

407

408 **Supporting Information S2.** Bat species recorded on the Anchieta Island, southeastern  
409 Brazil.

410

411 **Supporting Information S3.**  $\delta^{13}\text{C}$  and  $\delta^{15}\text{N}$  values of common vampire bats (*D.*  
412 *rotundus*) and potential prey (*H. hydrochaeris* and *N. nasua*) on Anchieta Island,  
413 southeastern Brazil, including the number of samples analyzed (N).

414

415 **Supporting Information S4.** Capture and sampling of common vampire bats (*D.*  
416 *rotundus*) and potential prey (1) capybaras (*H. hydrochaeris*) and (2) coati (*N. nasua*)  
417 on Anchieta Island, southeastern Brazil.

418

419 **Supporting Information S5.** Number of events of common vampire bats (*Desmodus*  
420 *rotundus*) feeding on capybaras (*Hydrochoerus hydrochaeris*) on Anchieta Island,  
421 southeastern Brazil.

422



423 **Literature Cited**

424

425 AIRES, C. C. 1998. Inventário e soroprevalência para raiva e leptospirose dos morcegos  
426 (Chiroptera, Mammalia) do Parque Estadual da Ilha Anchieta, Ubatuba, São Paulo.  
427 Monografia, Faculdades Integradas de Guarulhos, São Paulo.

428

429 BERNARD, E. 2001. Vertical stratification of bat communities in primary forests of  
430 Central Amazon, Brazil. *Journal of Tropical Ecology* 17:115–126.

431

432 BOBROWIEC, P. E. D., L. S. ROSA, J. GAZARINI, AND T. HAUGAASEN. 2014. Phyllostomid  
433 bat assemblage structure in Amazonian flooded and unflooded forests. *Biotropica*  
434 463:312–321.

435

436 BOBROWIEC, P. E. D., M. R. LEMES, AND R. GRIBEL. 2015. Prey preference of the  
437 common vampire bat (*Desmodus rotundus*, Chiroptera) using molecular analysis.  
438 *Journal of Mammalogy* 96:54-63.

439

440 BOLNICK, D. I., et al. 2002. The ecology of individuals: incidence and implications of  
441 individual specialization. *The American Naturalist* 161:1-28.

442

443 BOVENDORP, R. S. AND M. GALETTI. 2007. Density and population size of mammals  
444 introduced on a land-bridge island in southeastern Brazil. *Biological Invasions* 9:353-  
445 357.

446

447 COLAS-ROSAS, P. F. 2009. Estresse nos morcegos *Artibeus obscurus* e *Artibeus*  
448 *fimbriatus* (Chiroptera, Phyllostomidae) como resposta à perturbação ambiental.  
449 Monografia, Universidade Estadual Paulista, São Paulo.  
450 <https://repositorio.unesp.br/handle/11449/99511>.

451

452 COLWELL, R. K., AND ELSENSOHN, J. E. 2014. EstimateS turns 20: statistical estimation  
453 of species richness and shared species from samples, with non-parametric  
454 extrapolation. *Ecography*, 37(6):609–613.

455

456 DELPIETRO, H. A. 1989. Case reports on defensive behaviour in equine and bovine  
457 subjects in response to vocalization of the common vampire bat (*Desmodus rotundus*).  
458 *Applied Animal Behaviour Science*, 22:377-380.

459

460 DELPIETRO, H., N. MARCHEVSKY, AND E. SIMONETTI. 1992. Relative population  
461 densities and predation of the common vampire bat (*Desmodus rotundus*) in natural  
462 and cattle-raising areas in north-east Argentina. *Preventive Veterinary Medicine* 14:13-  
463 20.

464

465 FREITAS, M., A. WELKER, S. MILLAN, AND E. PINHEIRO. 2003. Metabolic responses  
466 induced by fasting in the common vampire bat *Desmodus rotundus*. *Journal of*  
467 *Comparative Physiology B* 173:703-707.

468

469 GALETTI, M., F. PEDROSA, A. KEUROGHLIAN, AND I. SAZIMA. 2016. Liquid lunch–  
470 vampire bats feed on invasive feral pigs and other ungulates. *Frontiers In Ecology And*  
471 *The Environment* 14:505-506.  
472  
473 GALETTI, M., R. S. BOVENDORP, R.F. FADINI, C. O. A. GUSSONI, M. RODRIGUES, A.D.  
474 ALVAREZ, P.R. GUIMARÃES JR AND K. ALVES. 2009. Hyper abundant mesopredators  
475 and bird extinction in an Atlantic forest island. *Zoology* 26: 288–298.  
476  
477 GARBINO, G. 2016. Research on bats (Chiroptera) from the state of São Paulo,  
478 southeastern Brazil: annotated species list and bibliographic review. *Arquivos de*  
479 *Zoologia*, 47(3):43-128.  
480  
481 GNOCCHI, A. P. AND SRBEK-ARAUJO, A. N. 2017. Common Vampire Bat (*Desmodus*  
482 *rotundus*) feeding on Lowland Tapir (*Tapirus terrestris*) in an Atlantic Forest remnant in  
483 southeastern Brazil. *Biota Neotropica* 17(3):e20170326.  
484  
485 GONÇALVES, F., BOVENDORP, R. S., BECA, G., BELLO, C., COSTA-PEREIRA, R.,  
486 MUYLEAERT, R. L., ... GALETTI, M. 2018. Atlantic Mammal Traits: a data set of  
487 morphological traits of mammals in the Atlantic Forest of South America. *Ecology*,  
488 99(2), 498.  
489  
490 GONÇALVES, F., E. FISCHER, AND R. DIRZO. 2017. Forest conversion to cattle ranching  
491 differentially affects taxonomic and functional groups of Neotropical bats. *Biological*  
492 *Conservation* 210:343–348.  
493  
494 GREENHALL, A. M., G. JOERMANN, AND U. SCHMIDT. 1983. *Desmodus rotundus*.  
495 *Mammalian Species*:1-6.  
496  
497 GUILLAUMON, J. R., et al. 1989. Plano de Manejo do Parque Estadual da Ilha Anchieta.  
498 IF – Série Registros São Paulo. Secretaria do Meio Ambiente, Instituto Florestal 103.  
499  
500 HEALY, K., T. GUILLERME, S. B. KELLY, R. INGER, S. BEARHOP, AND A. L. JACKSON. 2018.  
501 SIDER: an R package for predicting trophic discrimination factors of consumers based  
502 on their ecology and phylogenetic relatedness. *Ecography* 41:1393-1400.  
503  
504 JACKSON, A. L., R. INGER, A. C. PARNELL, AND S. BEARHOP. 2011. Comparing isotopic  
505 niche widths among and within communities: SIBER - Stable Isotope Bayesian Ellipses  
506 in R. *Journal of Animal Ecology* 80:595-602.  
507  
508 LAYMAN, C. A., D. A. ARRINGTON, C. G. MONTAÑA, AND D. M. POST. 2007. Can stable  
509 isotope ratios provide for community - wide measures of trophic structure? *Ecology*  
510 88:42-48.  
511  
512 LEE, D. N., M. PAPEŞ, AND R. A. VAN DEN BUSSCHE. 2012. Present and potential future  
513 distribution of common vampire bats in the Americas and the associated risk to cattle.  
514 *PLoS ONE* 7:e42466.  
515

- 516 MAGIOLI, M., et al. 2014. Stable isotope evidence of *Puma concolor* (Felidae) feeding  
517 patterns in agricultural landscapes in southeastern Brazil. *Biotropica* 46: 451-460.  
518
- 519 MAGIOLI, M., MOREIRA, M.Z., FONSECA, R.C.B., RIBEIRO, M.C., RODRIGUES, M.G. AND  
520 FERRAZ, K.M.P.M. DE B. 2019. Human-modified landscapes alter mammal resource  
521 and habitat use and trophic structure. *Proceedings of National Academic of Science*  
522 116:18466–18472.  
523
- 524 MARTIN, P., AND P.P.G. BATESON. 2007. *Measuring behaviour: An introductory guide*  
525 (2nd ed.). New York, NY, US: Cambridge University Press.  
526
- 527 MEDELLÍN, R. A., M. EQUIHUA, AND M. A. AMIN. 2000. Bat Diversity and Abundance as  
528 Indicators of Disturbance in Neotropical Rainforests. *Conservation Biology* 14:1666–  
529 1675.  
530
- 531 MUYLAERT, R. et al. 2017. Atlantic bats: a data set of bat communities from the  
532 Atlantic Forests of South America. *Ecology* 98(12), 3227.  
533
- 534 PETERSON, B. J., AND B. FRY. 1987. Stable isotopes in ecosystem studies. *Annual*  
535 *Review of Ecology and Systematics* 18(1), 293–320.  
536
- 537 SCHNEIDER, M. C., et al. 2009. Rabies transmitted by vampire bats to humans: an  
538 emerging zoonotic disease in Latin America? *Revista Panamericana de Salud Pública*  
539 25:260-269.  
540
- 541 SHEPPARD, S. K., AND J. D. HARWOOD. 2005. Advances in molecular ecology: tracking  
542 trophic links through predator–prey food-webs. *Functional Ecology* 19:751–762.  
543
- 544 SIKES, R. S. 2016. Guidelines of the American Society of Mammalogists for the use of  
545 wild mammals in research and education. *Journal of Mammalogy* 97:663-688.  
546
- 547 SOUZA, Y., GONÇALVES, F., LAUTENSCHLAGER, L., AKKAWI, P., MENDES, C., CARVALHO,  
548 M. M., ... GALETTI, M. 2019. Atlantic Mammals: a data set of assemblages of medium-  
549 and large-sized mammals of the Atlantic Forest of South America. *Ecology*, 100(10),  
550 e02785.  
551
- 552 STOCK, B. C. AND B. X. SEMMENS. 2016. Unifying error structures in commonly used  
553 biotracer mixing models. *Ecology* 97:2562-2569.  
554
- 555 STONER-DUNCAN, B., D. G. STREICKER, AND C. M. TEDESCHI. 2014. Vampire bats and  
556 rabies: toward an ecological solution to a public health problem. *PLoS neglected*  
557 *tropical diseases* 8:e2867.  
558
- 559 STREICKER, D. G. AND J. E. ALLGEIER. 2016. Foraging choices of vampire bats in diverse  
560 landscapes: potential implications for land use change and disease transmission.  
561 *Journal of Applied Ecology* 53:1280-1288.  
562

- 563 VOIGT, C. C. AND D. H. KELM. 2006. Host preference of the common vampire bat  
564 (*Desmodus rotundus*; Chiroptera) assessed by stable isotopes. Journal of Mammalogy  
565 87:1-6.  
566
- 567 VOIGT, C.C., GRASSE, P., REX, K., HETZ, S.K. AND SPEAKMAN, J.R. 2008 . Bat breath  
568 reveals metabolic substrate use in free-ranging vampires. Journal of Comparative  
569 Physiology B 178: 9–16.  
570
- 571 WERNER, E. E., AND S. D. PEACOR. 2003. A review of trait-mediated indirect  
572 interactions in ecological communities. Ecology 84:1083–1100.  
573
- 574 ZORTÉA, M., SILVA, D. A., AND CALAÇA A. M. 2018 . Susceptibility of targets to the  
575 vampire bat *Desmodus rotundus* are proportional to their abundance in Atlantic Forest  
576 fragments? Iheringia 108:e2018037  
577
